# Supplementary material for: Investigation of the non-covalent interactions of molecular self-assembly by scanning tunneling microscopy using the association of aromatic structures in pyrene-4,5,9,10-tetraone and phenanthrene-9,10-dione molecules
Source: Royal Society of Chemistry journal article supplement (doi:10.1039/c5ra20316c), 2015-01-01

## Supporting Information

### **Investigating Non-covalent Interactions of Molecular Self-assembly with the Association of Aromatic Structures in Pyrene-4,5,9,10-tetraone and Phenanthrene-9,10-dione Molecules by Scanning Tunneling Microscopy**

*Huiling Zhao,<sup>a,c</sup> Shuai Zhang,<sup>c</sup> Shuang Li,<sup>b</sup> Xin Song,<sup>c</sup> Wei Liu,<sup>b</sup> Bo Liu<sup>a\*</sup> and Mingdong Dong<sup>c\*</sup>*

<sup>a</sup> Institute of Photo-biophysics, School of Physics and Electronics, Henan University, 475004,

China

<sup>b</sup> School of Materials Science and Engineering, Nanjing University of Science and Technology,

210094, China

<sup>c</sup> Interdisciplinary Nanoscience Center (iNANO), Aarhus University, DK 8000 Aarhus C,

Denmark

**Fig.S1** (a) Absorption spectra with baseline of **PD** and **PT** dissolved in chloroform; (b) and (c) fluorescent spectra of **PD** and **PT** dissolved in chloroform, respectively.

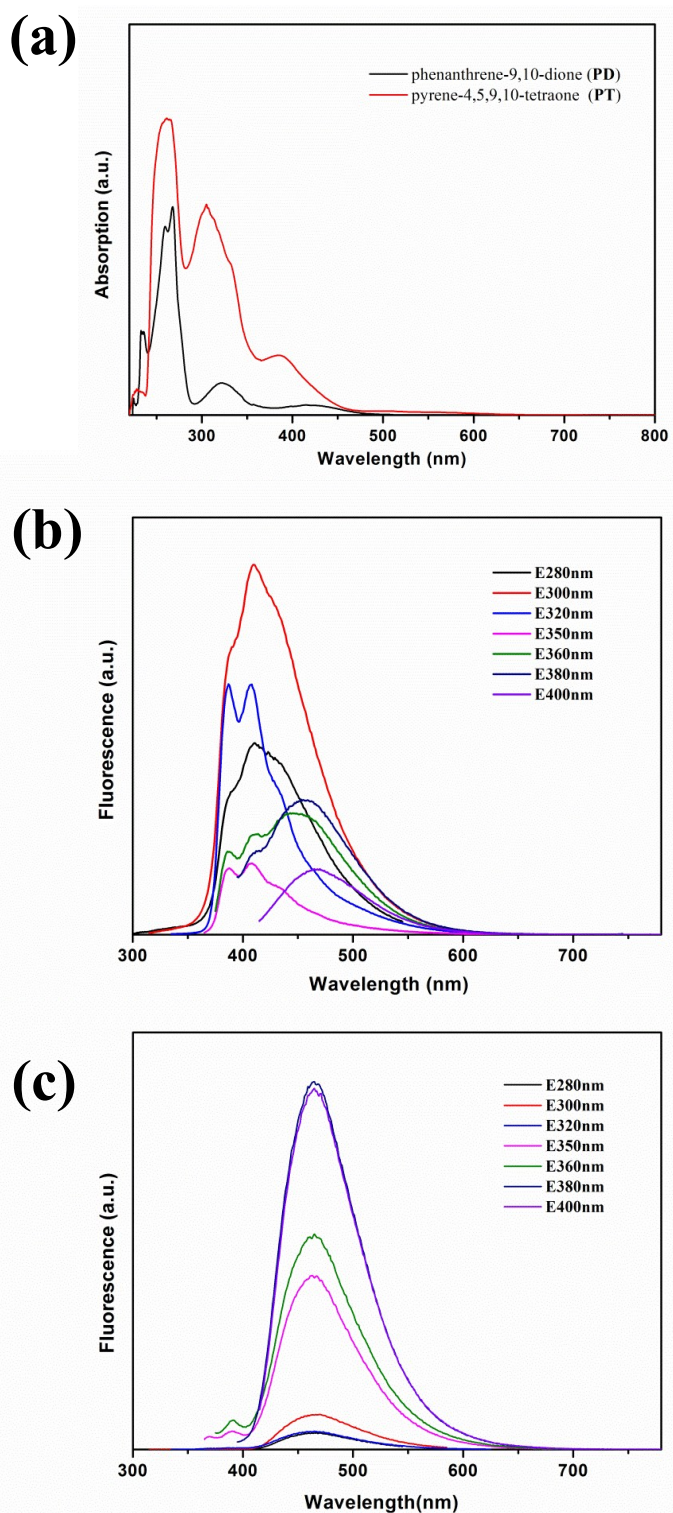

**Fig.S2** (a) Schematic defining the intermolecular bond distances, angle  $\theta_1$  around electrophilic H atoms and angle  $\theta_2$  around the nucleophilic O atoms in the chevron structure formed by **PT** molecules. (b) Measured bond distances  $d$  for intermolecular bonds and measured  $\theta$  values in calculated structures.

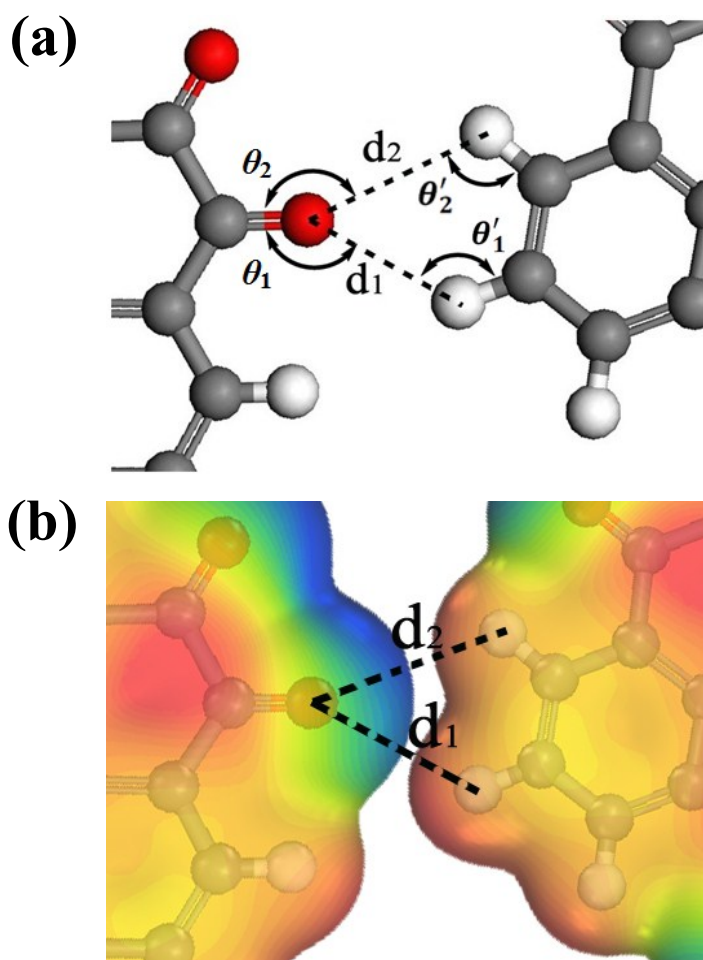

| <i>Distance</i><br>$d_1$ (nm) | <i>Angle</i><br>$\theta_1$ (°) | <i>Angle</i><br>$\theta'_1$ (°) | <i>Distance</i> $d_2$<br>(nm) | <i>Angle</i><br>$\theta_2$ (°) | <i>Angle</i><br>$\theta'_2$ (°) |
|-------------------------------|--------------------------------|---------------------------------|-------------------------------|--------------------------------|---------------------------------|
| 0.25                          | 170                            | 152                             | 0.34                          | 148                            | 107                             |

**Fig.S3** (a) Schematic defining the intermolecular bond distance  $d$ , angle around H atoms located at both ends of **PD** molecules. (b) Measured bond distances for intermolecular bonds and measured  $\theta$  values in calculated structures.

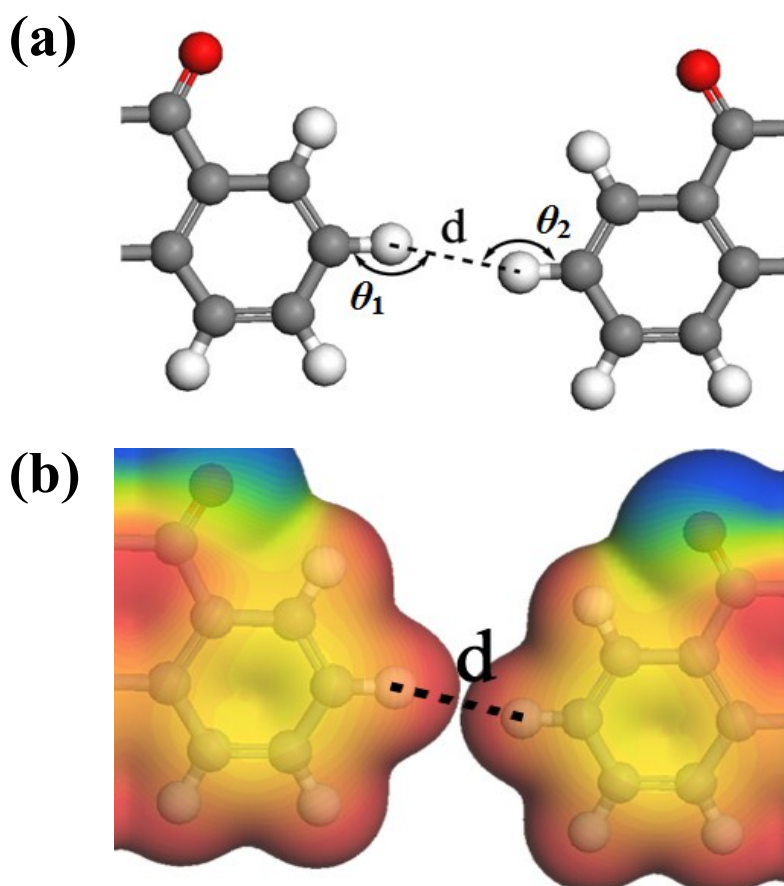

| <i>Distance <math>d</math>(nm)</i> | <i>Angle <math>\theta_1</math>(°)</i> | <i>Angle <math>\theta_2</math>(°)</i> |
|------------------------------------|---------------------------------------|---------------------------------------|
| 0.25                               | 155                                   | 155                                   |

**Fig.S4** The typical STM image with high resolution obtained in PT and PD binary assembly experiment.

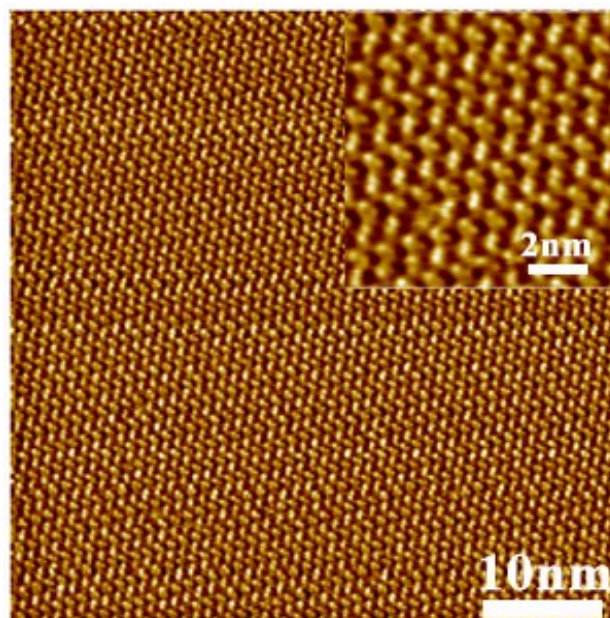

Supplement: c5ra20316c1.pdf [file c5ra20316c1.pdf]
